# Supplementary material for: Properties and dynamics of meron topological spin textures in the two-dimensional magnet CrCl3
Source: PubMed Central journal article supplement (PMC7794561; doi:10.1038/s41467-020-20497-2), 2021-01-08
Supplement: 41467_2020_20497_MOESM1_ESM.pdf [file 41467_2020_20497_MOESM1_ESM.pdf]

1 **Supplementary Information:**  
2 **Properties and dynamics of meron topological spin textures**  
3 **in the two-dimensional magnet CrCl<sub>3</sub>**

4 Mathias Augustin<sup>1</sup>, Sarah Jenkins<sup>2</sup>, Richard F. L. Evans<sup>2</sup>, Kostya S. Novoselov<sup>3,4</sup> & Elton J. G.  
5 Santos<sup>5,†</sup>

6 <sup>1</sup>*School of Mathematics and Physics, Queen's University Belfast, BT7 1NN, UK*

7 <sup>2</sup>*Department of Physics, The University of York, York, YO10 5DD, UK*

8 <sup>3</sup>*Department of Material Science & Engineering, National University of Singapore, Block EA, 9*  
9 *Engineering Drive 1, 117575, Singapore*

10 <sup>4</sup>*Chongqing 2D Materials Institute, Liangjiang New Area, Chongqing 400714, China*

11 <sup>5</sup>*Institute for Condensed Matter Physics and Complex Systems, School of Physics and Astronomy,*  
12 *The University of Edinburgh, EH9 3FD, UK.*

13 <sup>†</sup>*Corresponding author: esantos@ed.ac.uk*

14 **Contents**

15 **1 Computational details** **3**

16 **2 Simulation movies** **4**

|    |                                                                                      |           |
|----|--------------------------------------------------------------------------------------|-----------|
| 17 | <b>3 Calculation of the meron and anti-meron radius</b>                              | <b>6</b>  |
| 18 | <b>4 Computing the topological quantum number</b>                                    | <b>10</b> |
| 19 | <b>5 Spin dynamics on other Cr-trihalide materials: CrX<sub>3</sub> (X=F, Br, I)</b> | <b>13</b> |

## 20 **1 Computational details**

21 **Ab initio methods:** First-principles calculations were performed using the projector-augmented  
22 wave (PAW) method in the framework of density-functional theory (DFT), as it implemented in the  
23 VASP code <sup>1</sup>. The lattice parameters were optimized with a variable cell-shape relaxation method  
24 to minimize forces and internal pressure. The electron-ion interaction was described by means  
25 of PBE functional<sup>2</sup>, where a plane wave kinetic energy cutoff was set to 500 eV. The tetrahedron  
26 method with Blöchl corrections and  $\Gamma$ -centered k-points meshes  $15 \times 15 \times 1$  were used for inte-  
27 gration in the irreducible Brillouin zone. This ensures a convergence of total energy to less than  
28  $10^{-6}$  eV/atom. We have taken into account strong correlation corrections in the frame of GGA+U  
29 simplified scheme introduced by Dudarev et al. <sup>3</sup>. We used an effective Hubbard  $U_{eff} = U - J$   
30 which values were previously obtained using linear response method<sup>4</sup> for  $\text{CrCl}_3$  of 2.63 eV.

31 **Atomistic approximations:** Curie temperature calculations based on DFT simulations were mapped  
32 onto spin Hamiltonians by calculating total energies of different spin configurations in the  $2 \times 2$  su-  
33 percell as described in Ref.<sup>5</sup>. The magnetization as a function of temperature were calculated by  
34 using Monte Carlo method in the frame of the developed version of the Vampire atomistic spin dy-  
35 namics package <sup>6</sup>. A  $288 \times 166 \times 1$  model super-cell (191232 sites in total) based on the rectangular  
36 unit cell of honeycomb lattice (4 sites) with periodic boundary conditions was used.

37 The spin dynamics calculations are performed using atomistic spin dynamics within the  
38 stochastic Landau-Lifshitz-Gilbert equation<sup>7</sup> integrated with the Heun numerical scheme and 1  
39 fs timestep <sup>6</sup>. Equilibrium temperature dependent properties are computed using the Monte Carlo

40 Metropolis method integrated with the adaptive move algorithm<sup>8</sup>. The dipole field contributions  
41 are computed using the macrocell approximation<sup>9</sup> with a 1 nm cell size and refined using a paral-  
42 lel fully atomistic dipole-dipole field calculation. A gyromagnetic ration of  $1.76 \text{ T}^{-1}\text{s}^{-1}$  is used  
43 throughout the simulations. The atomistic calculation utilizes a recently implemented massively  
44 parallel algorithm allowing such calculations with full generality and high accuracy<sup>10</sup>.

45

## 46 **2 Simulation movies**

47 **Movie S1:** Spin dynamics showing the cooling down process at zero magnetic field from 80 K  
48 down to 0 K for monolayer  $\text{CrCl}_3$ .

49 **Movie S2:** Similar as the Movie S1, but at a 50 mT magnetic field.

50 **Movie S3:** Similar as the Movie S1, but at a 500 mT magnetic field.

51 **Movie S4:** Spin dynamics at zero field and 0 K showing the collision process between a vortex  
52 and an antivortex since the early times when both are relatively isolated till they collapsed. Two  
53 antimerons are involved in this process.

54 **Movie S5:** Similar as Movie S4, but involving a meron and a antimeron.

55 **Movie S6:** Macro-dynamics of the magnetic domains showing the movement of the vortex and  
56 antivortex at the boundary between domain structures. The colors of the vortex and antivortex  
57 (blue and red) are kept the same as the one for the  $S^y$  component of the magnetization to simplify  
58 the analysis. However, the core of the spin textures are primarily composed by out-of-plane spins  
59 as highlighted in Figure 2.

60 **Movie S7:** Spin dynamics showing the cooling down process at zero magnetic field from 80 K  
61 down to 0 K for monolayer CrI<sub>3</sub>.

62 **Movie S8:** Spin dynamics showing the cooling down process at zero magnetic field from 60 K  
63 down to 0 K for monolayer CrBr<sub>3</sub>.

64 **Movie S9:** Spin dynamics showing the cooling down process at zero magnetic field from 80 K  
65 down to 0 K for monolayer CrF<sub>3</sub>.

66

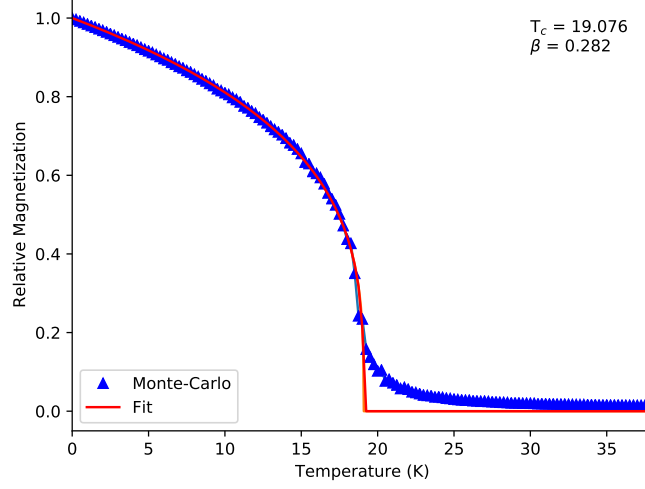

Figure S1: Calculated relative magnetization (a.u.) versus temperature (K) for monolayer CrCl<sub>3</sub> (blue triangles). Fit curve is obtained by using equation  $M(T) = (1 - T/T_c)^\beta$ , where  $T_c$  is the critical temperature and  $\beta$  the critical exponent. Converged values of  $T_c$  in Kelvin and  $\beta$  are included in the plot.

### 67 3 Calculation of the meron and anti-meron radius

68 The estimation of the full width at half maximum is done by fitting Pearson type VII function with  
 69  $m = 3$  to our  $S^z$  data profile:

$$f(x) = I_{max} \left[ 1 + 4 \left( 2^{\frac{1}{3}} - 1 \right) \left( \frac{x - x_0}{w_F} \right)^2 \right]^{-3} \quad (1)$$

70 where  $I_{max}$  is the maximum value of the peak,  $x_0$  is the center of the peak and  $w_F$  is the  
 71 FWHM. The fitting immediately gives the FWHM but to extract the radius of the bubble, we have  
 72 to find the  $x_{lim}$  s.t.  $f(x < x_{lim}) < \alpha$ , with  $\alpha$  an arbitrary small value (we choose  $\alpha = 10^{-2}$ ). Thus  
 73 we need to solve the equation:

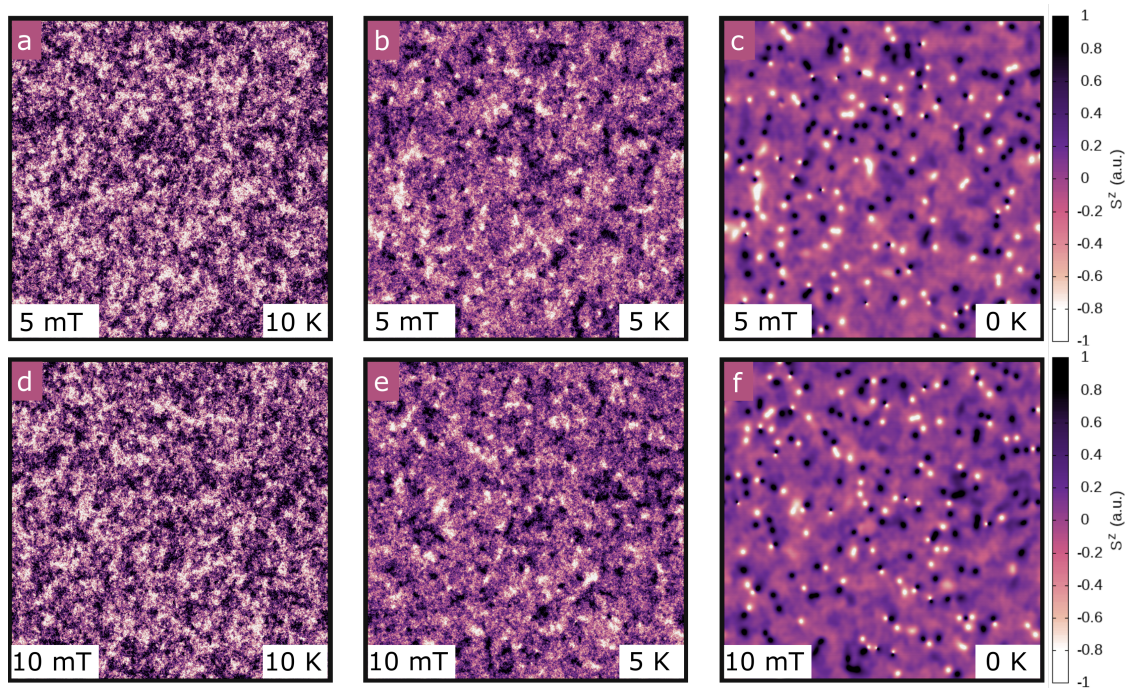

Figure S2: Spin dynamics of monolayer  $\text{CrCl}_3$  at different magnitudes of magnetic field and temperatures: **a-c** 5 mT and **d-f** 10 mT. The out-of-plane spin component  $S^z$  is utilized to follow the nucleation of meron and antimerons across the surface (bright and dark dots).

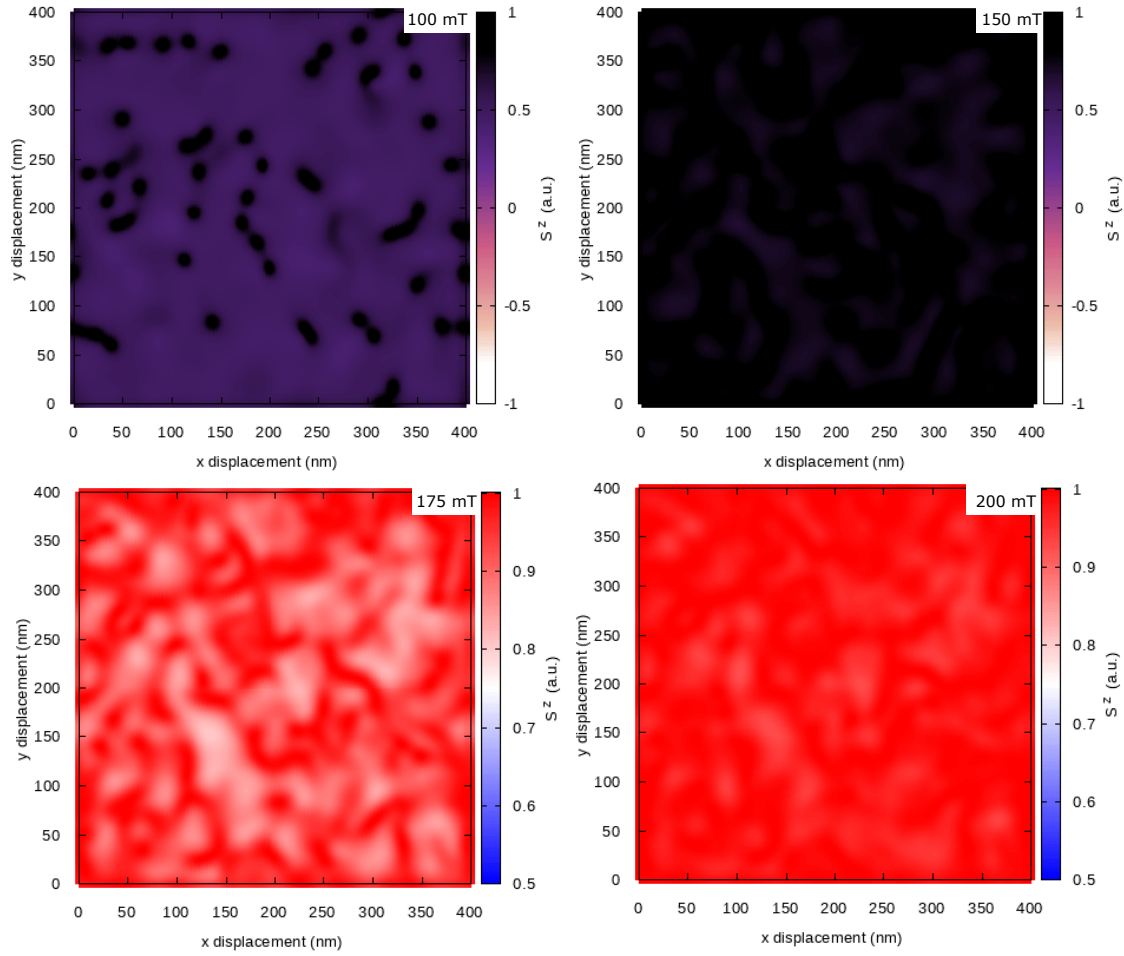

Figure S3: Spin dynamics of monolayer  $\text{CrCl}_3$  at different magnitudes of magnetic field: 100 mT, 150 mT, 175 mT and 200 mT. The out-of-plane spin component  $S_z$  is utilized to follow the nucleation of meron and antimerons across the surface. At 100 mT, all nucleated spin textures have similar polarization ( $S_z = 1$ ) with features following those at lower fields. For magnetic fields beyond 150 mT there is no formation of spin quasiparticles as all domains are strongly field polarized. A different scale colour (red-blue) is utilized for fields larger than 150 mT to allow observations of further features in the spin dynamics. Such colour scale is instrumental to identify small variations of  $S^z$  throughout the surface.



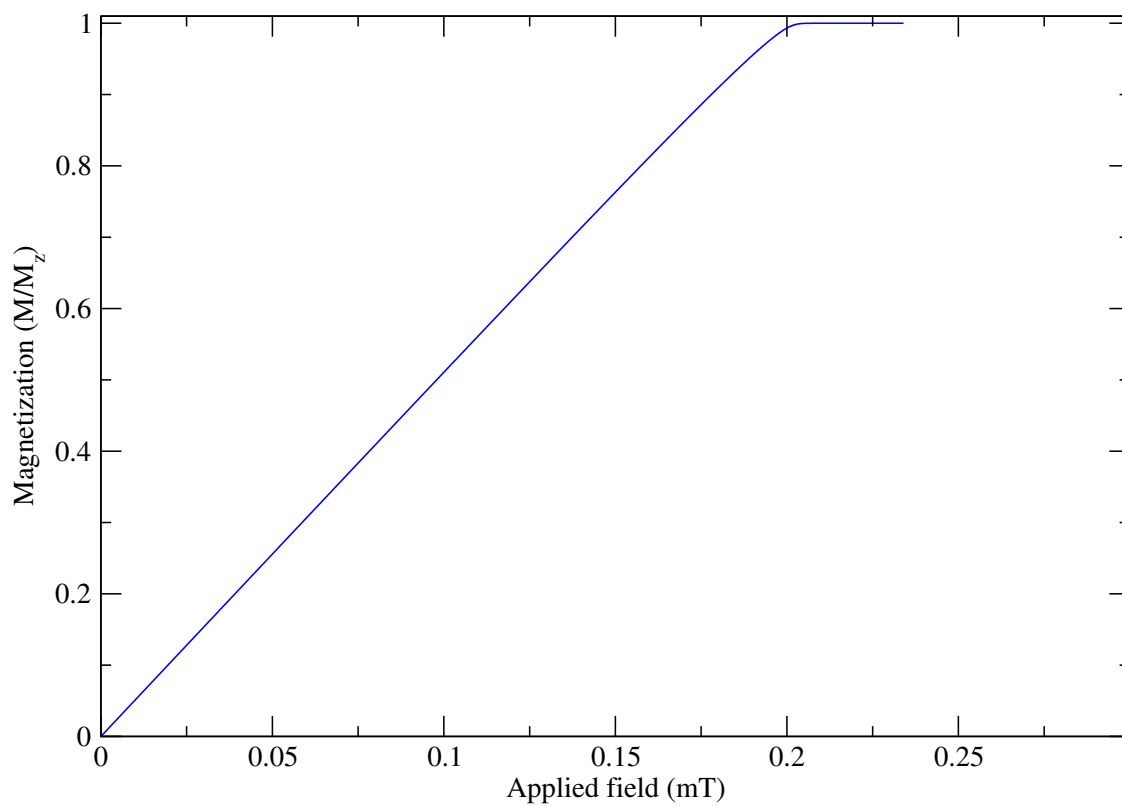

Figure S4: We estimated the critical magnetic field for monolayer  $\text{CrCl}_3$  performing simulations on the hysteresis curve on one side of the full loop. The simulation were done with a starting field of 0 mT to a final 0.235 mT with an increment of 0.0005mT.

$$\begin{aligned}
\alpha &= I_{max} \left[ 1 + 4 \left( 2^{\frac{1}{3}} - 1 \right) \left( \frac{x_{lim} - x_0}{w_F} \right)^2 \right]^{-3} \\
\Rightarrow w_F^2 + (x_{lim} - x_0)^2 &= \alpha^{-\frac{1}{3}} w_F^2 I_{max}^{\frac{1}{3}} \\
\Rightarrow 0 &= x_{lim}^2 - 2x_{lim}x_0 + x_0^2 + w_F^2 \left( 1 - \alpha^{-\frac{1}{3}} I_{max}^{\frac{1}{3}} \right)
\end{aligned} \tag{2}$$

and thus we find:

$$x_{lim}^{\pm} = x_0 \pm w_F \sqrt{\alpha^{-\frac{1}{3}} I_{max}^{\frac{1}{3}} - 1} \tag{3}$$

and

$$R = \frac{x_{lim}^+ - x_{lim}^-}{2} = w_F \sqrt{\alpha^{-\frac{1}{3}} I_{max}^{\frac{1}{3}} - 1} \tag{4}$$

#### 74 **4 Computing the topological quantum number**

In the continuum case the topological charge Q is:

$$Q = \frac{1}{4\pi} \int d^2r \left( \frac{\partial \mathbf{s}}{\partial x} \times \frac{\partial \mathbf{s}}{\partial y} \right) \cdot \mathbf{s} \tag{5}$$

75 where  $\mathbf{s}$  is the three-component spin field. This charge can also be defined for a lattice spin field  $\mathbf{S}$

76 :

$$Q = \frac{1}{4\pi} \sum_{\Omega} [\Omega(\mathbf{S}_1, \mathbf{S}_2, \mathbf{S}_3) + \Omega(\mathbf{S}_1, \mathbf{S}_3, \mathbf{S}_4)] \tag{6}$$

77 with  $\Omega(\mathbf{S}_1, \mathbf{S}_2, \mathbf{S}_3)$  denoting the signed area of the spherical triangle with corner  $\mathbf{S}_1, \mathbf{S}_2, \mathbf{S}_3$ .

78 The convention we used for the signed area is shown in Fig.S5 with the blue and red triangle.

79 The topological charge is obtained by gluing together all elementary triangles (the blue and red  
80 triangles in FigS5 are elementary triangles). The formula to compute the signed area  $\Omega$  with unit  
81 spin vectors<sup>1</sup> is <sup>12</sup>:

$$\exp\left(i\frac{\Omega(\mathbf{S}_1, \mathbf{S}_2, \mathbf{S}_3)}{2}\right) = \rho^{-1} [1 + \mathbf{S}_1 \cdot \mathbf{S}_2 + \mathbf{S}_2 \cdot \mathbf{S}_3 + \mathbf{S}_3 \cdot \mathbf{S}_1 + i\mathbf{S}_1 \cdot (\mathbf{S}_2 \times \mathbf{S}_3)] \quad (7)$$

where

$$\rho = [2(1 + \mathbf{S}_1 \cdot \mathbf{S}_2)(1 + \mathbf{S}_2 \cdot \mathbf{S}_3)(1 + \mathbf{S}_3 \cdot \mathbf{S}_1)]^{\frac{1}{2}}$$

the previous equation can be written as:

$$\tan\left(\frac{\Omega(\mathbf{S}_1, \mathbf{S}_2, \mathbf{S}_3)}{2}\right) = \frac{\mathbf{S}_1 \cdot (\mathbf{S}_2 \times \mathbf{S}_3)}{1 + \mathbf{S}_1 \cdot \mathbf{S}_2 + \mathbf{S}_2 \cdot \mathbf{S}_3 + \mathbf{S}_3 \cdot \mathbf{S}_1} \quad (8)$$

82 This kind of topological charge on honeycomb/hexagonal lattice was done in <sup>13</sup> and it gives  
83 the expected results for skyrmions.

84 To compute the topological charge of our bubbles we wrote a code:

- 85 • First we create a file containing only one bubble with the coordinate order in x. This gives a  
86 number of rows with the same x and different y coordinates as shown in Fig. S5 (the i, i+1,  
87 etc).

---

<sup>1</sup>We use this formula because vampire outputs unit vectors, one can find a more general formula in <sup>11</sup>

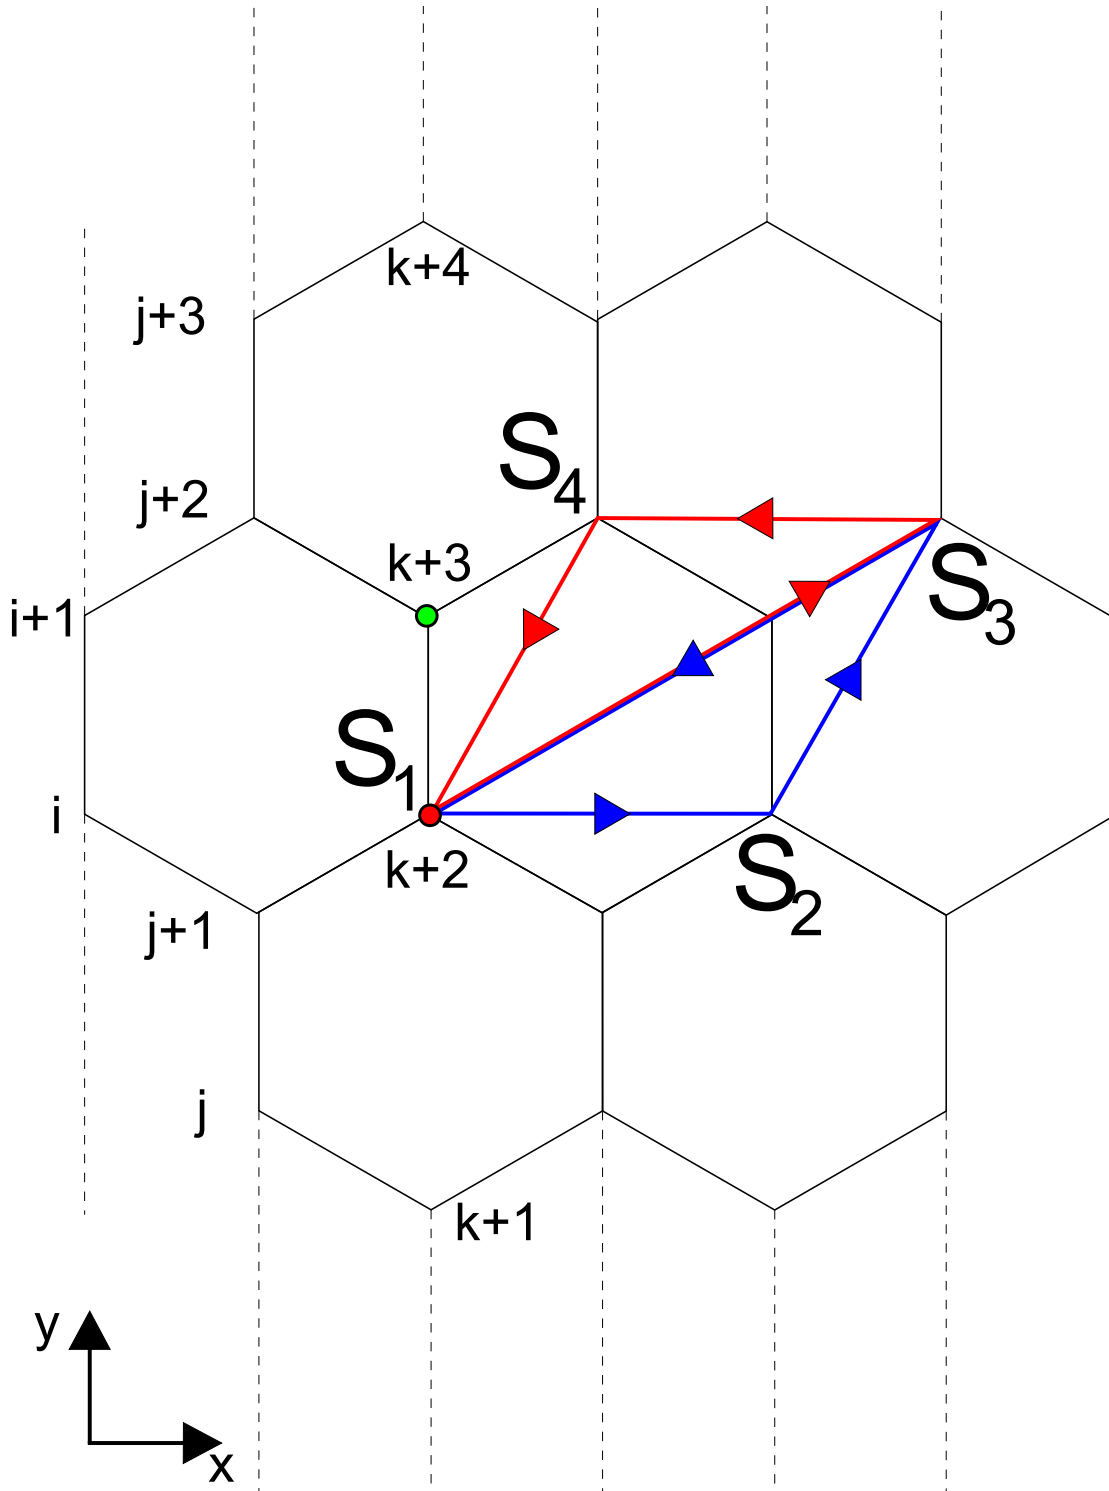

Figure S5: Honeycomb lattice showing spins  $S_i$  ( $i = 1, 2, 3, 4$ ) following a counter-clockwise order on each triangle grid. The different sites are denoted by  $j, k$  and  $i$  indexes.

- 88 • Then we choose a spin called  $\mathbf{S}_1$  by taking the first row in the file (then the second, third,<sup>*i*th</sup>).
- 89 From there we need to make sure to always keep the same convention for all triangles i.e.,
- 90 for a chosen  $\mathbf{S}_1$  the associated  $\mathbf{S}_2, \mathbf{S}_3, \mathbf{S}_4$  will always have the same relative position. Our
- 91 convention is shown in Fig S5.
- 92 • To obtain  $\mathbf{S}_2$  we check that the distance  $d$  between  $\mathbf{S}_1$  and  $\mathbf{S}_2$  is equal to the lattice parameter
- 93  $l_0$  of  $\text{CrCl}_3$ <sup>2</sup>, and we make sure that the y coordinate of both spins is the same. Because we
- 94 look for  $\mathbf{S}_2$  only in rows after the row of  $\mathbf{S}_1$ , our criteria make  $\mathbf{S}_2$  unique.
- 95 • For  $\mathbf{S}_4$  we use the criteria:  $d(\mathbf{S}_1, \mathbf{S}_4) = l_0$ ,  $d(\mathbf{S}_2, \mathbf{S}_4) = l_0$  and the y component of  $\mathbf{S}_4$  is bigger
- 96 than the y component of  $\mathbf{S}_1$ . Again, these criteria make  $\mathbf{S}_4$  unique.
- 97 • Finally, for  $\mathbf{S}_3$  we want  $d(\mathbf{S}_2, \mathbf{S}_3) = l_0$ ,  $d(\mathbf{S}_4, \mathbf{S}_3) = l_0$  and  $d(\mathbf{S}_1, \mathbf{S}_3) = 12.26$  angstroms,
- 98 making  $\mathbf{S}_3$  unique.

99 **5 Spin dynamics on other Cr-trihalide materials:  $\text{CrX}_3$  ( $\text{X}=\text{F}, \text{Br}, \text{I}$ )**

---

<sup>2</sup> $\mathbf{S}_1$  and  $\mathbf{S}_2$  are second nearest neighbour in a honeycomb lattice

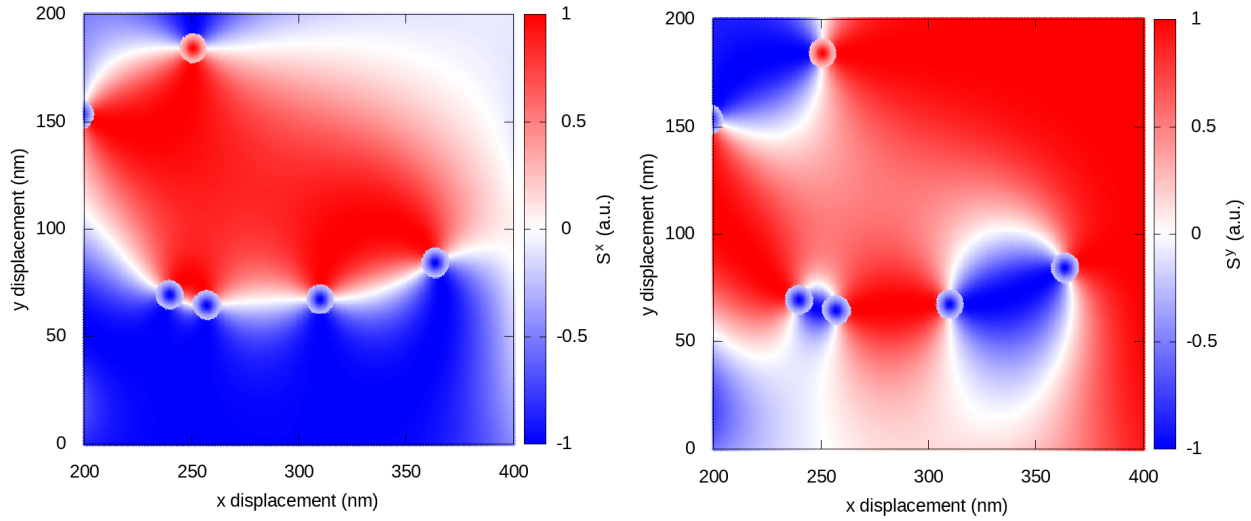

Figure S6: Snapshot of a magnetic domain configuration on monolayer  $\text{CrCl}_3$  projected on in-plane spin components:  $S^x$  and  $S^y$ . The small circles (blue and red) show the different spin textures stabilized during the cooling process.

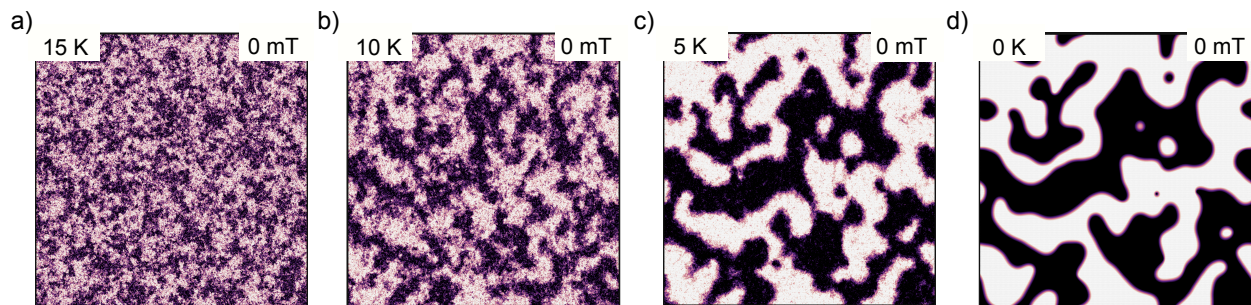

Figure S7: a)-d) Spin dynamics of monolayer  $\text{CrCl}_3$  without taking into account dipole-dipole interactions at zero field and at different temperatures. As the system cools down, there is no appearance of topological spin-textures over the surface. The small bubbles observed in d) disappeared at longer times. Interestingly, the magnetic domains have out-of-plane magnetization following the single ion anisotropy. Only the  $S^z$  component is showed similarly as in Figure 1.

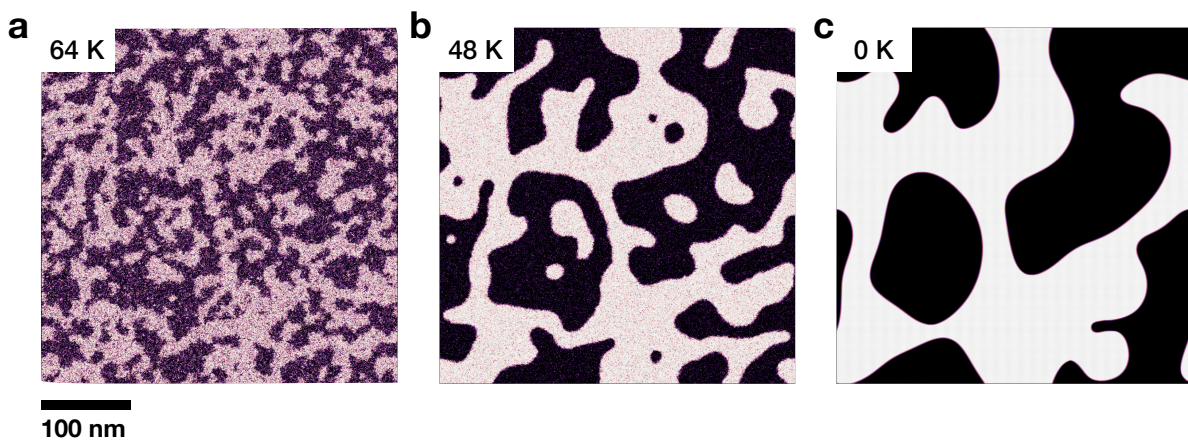

Figure S8: Zero-field cooling simulations for monolayer CrI<sub>3</sub> from temperatures above the Curie temperature (64 K) till 0 K. We use similar setup as those for monolayer CrCl<sub>3</sub>. The out-of-plane component of the magnetization ( $S^z$ ) is displayed in the plots. Dark/bright areas correspond to spins point either up or down to the surface.

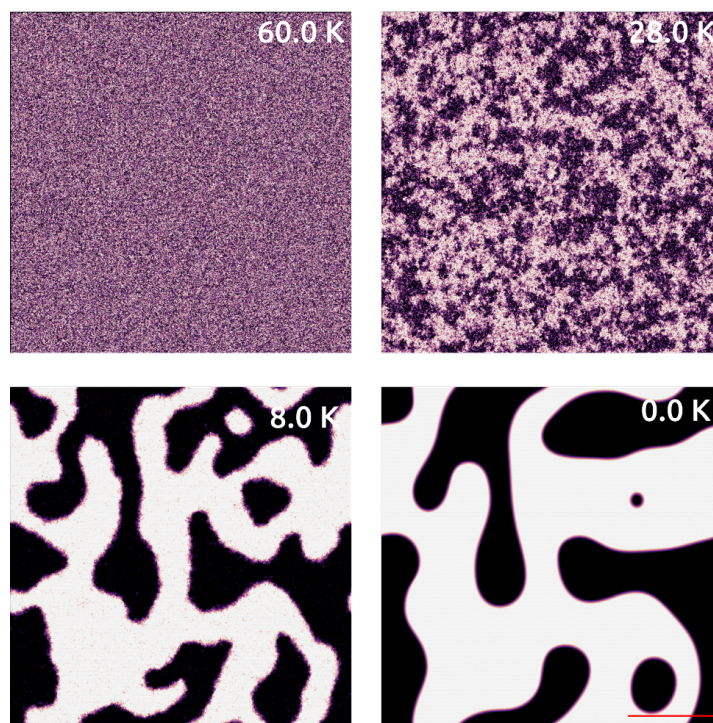

Figure S9: Zero-field cooling simulations for monolayer  $\text{CrB}_3$  from temperatures above the Curie temperature (60 K) till 0 K. We use similar setup as those for monolayer  $\text{CrCl}_3$ . The out-of-plane component of the magnetization ( $S^z$ ) is displayed in the plots. Dark/bright areas correspond to spins point either up or down to the surface. The scale bar is 100 nm.



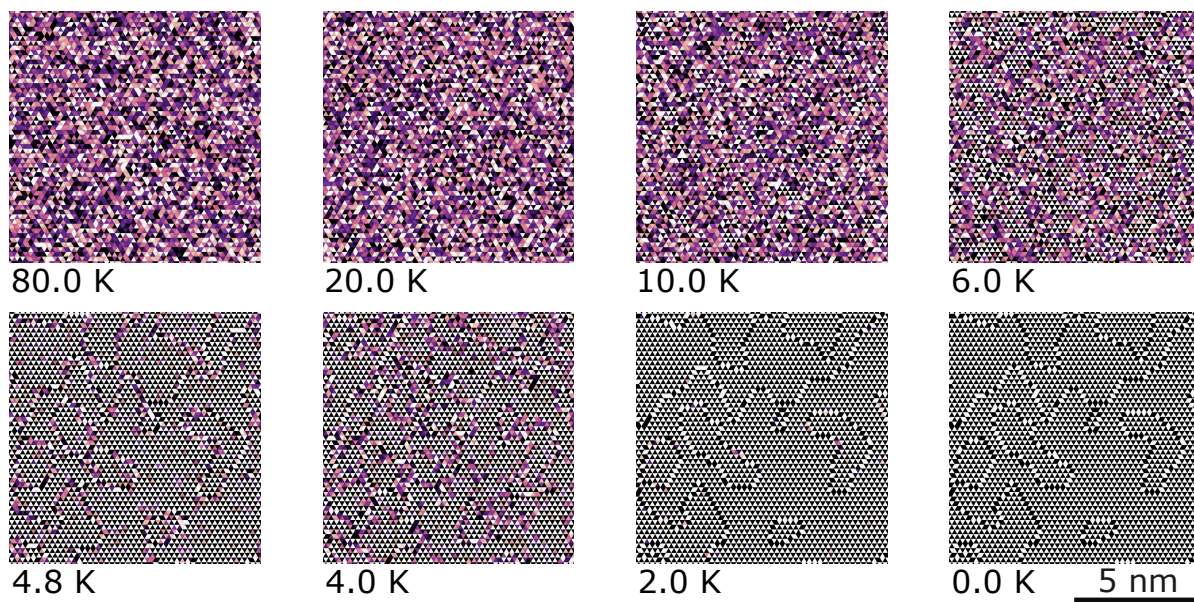

Figure S10: Zero-field cooling simulations for monolayer  $\text{CrF}_3$  from temperatures above the Curie temperature (80 K) till 0 K. We use similar setup as those for monolayer  $\text{CrCl}_3$ . The out-of-plane component of the magnetization ( $S^z$ ) is displayed in the plots. Dark/bright areas correspond to spins point either up or down to the surface. Due to the anti-ferromagnetic character of the exchange coupling in  $\text{CrF}_3$  the magnetic domains look differently than the other Cr-trihalides.

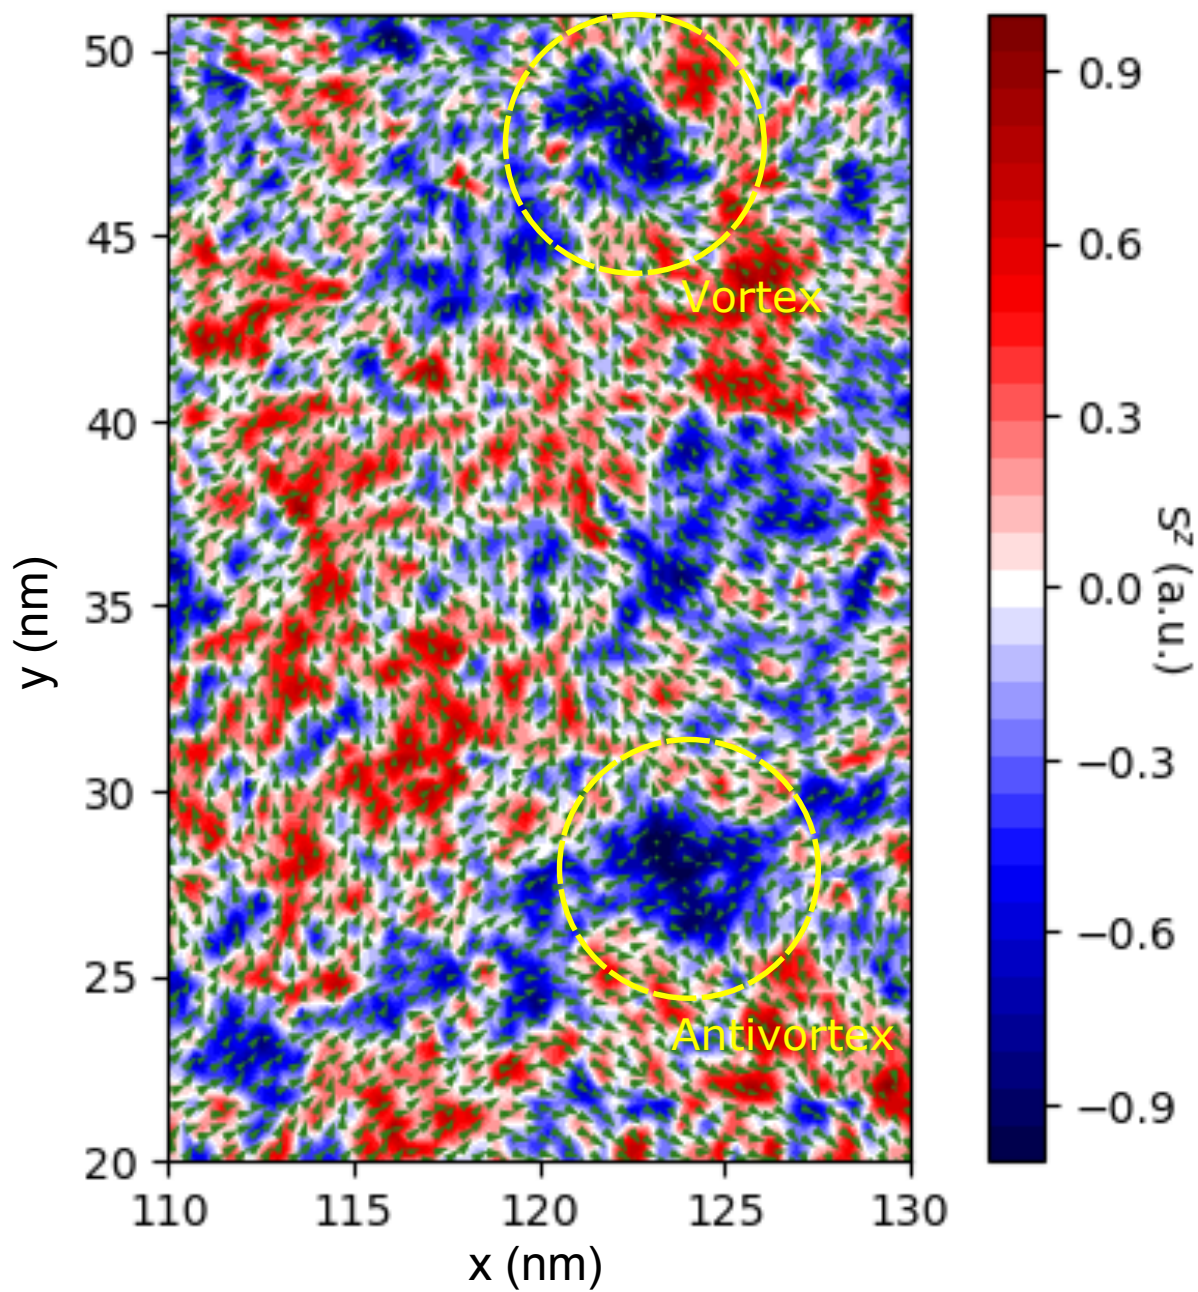

Figure S11: Snapshot of a spin dynamics of  $\text{CrCl}_3$  at 8 K without considering dipolar interactions at any direction but setting an easy-plane (XY) for the magnetic anisotropy<sup>14,15</sup>.

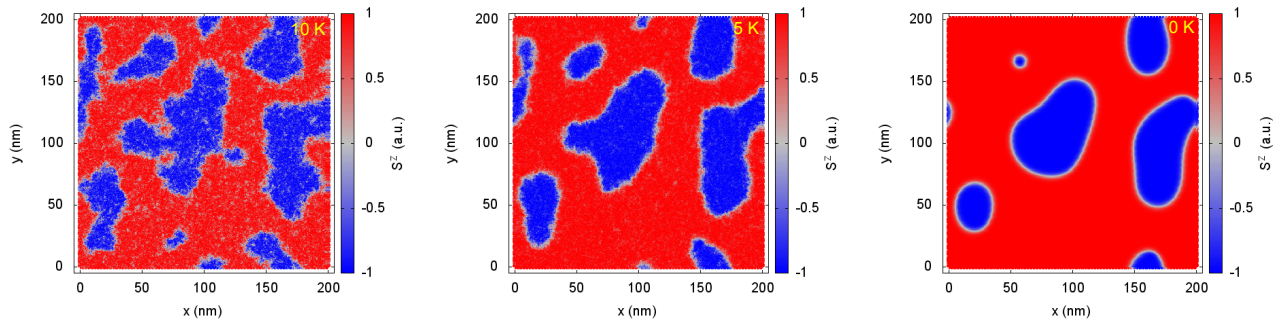

Figure S12: Snapshot of a spin dynamics of  $\text{CrCl}_3$  at different temperatures (10 K, 5 K, 0 K) without considering second- and third-nearest neighbours ( $J_{2nd}$ ,  $J_{3rd}$ ,  $\lambda_{2nd}$ ,  $\lambda_{3rd}$ ) but including dipolar interactions and biquadratic exchange into the simulations. There is no formation of vortex or antivortex spin textures throughout the system at this level of theory.

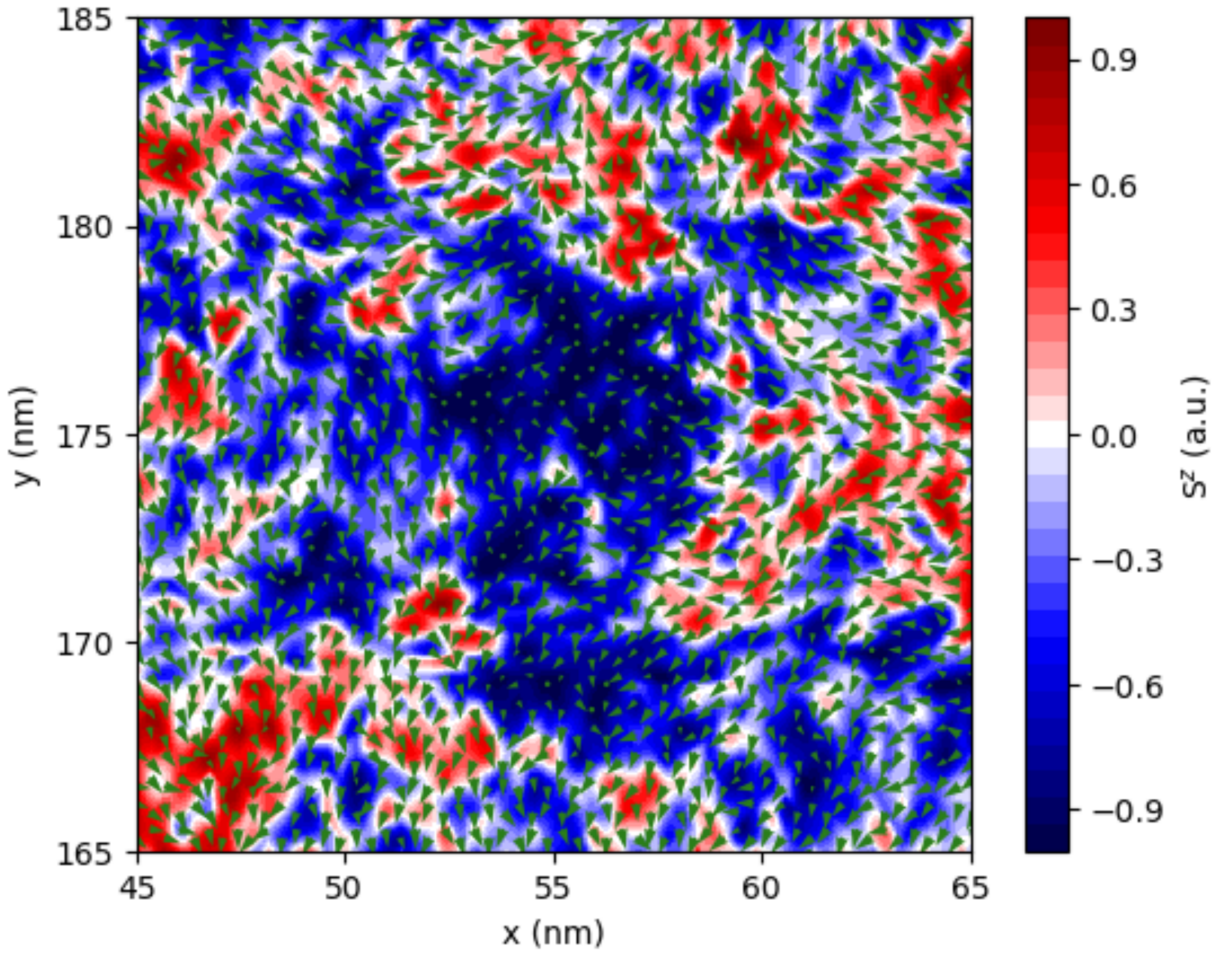

Figure S13: Snapshot of a spin dynamics of  $\text{CrCl}_3$  at 8 K without considering biquadratic exchange but including up to third-nearest neighbours on bilinear exchange and dipolar interactions. The formation of merons and antimerons become more chaotic on the spin patterns.

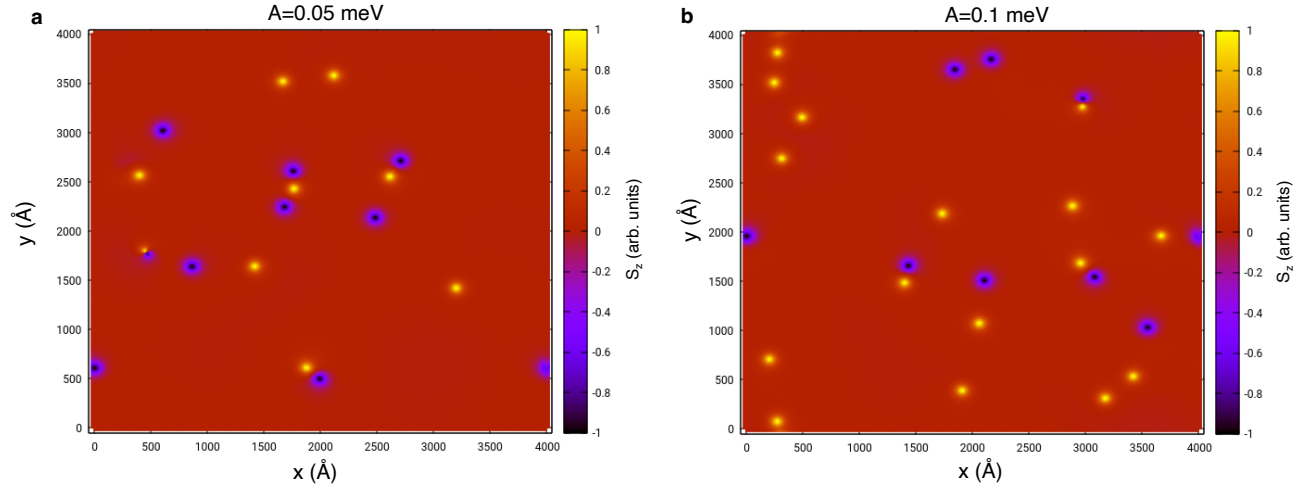

Figure S14: **a-b**, Snapshots of a spin dynamics of  $\text{CrCl}_3$  at 0 K taking into account Dzyaloshinskii-Moriya interaction (DMI) with  $A = 0.05 \text{ meV}$  and  $A = 0.1 \text{ meV}$ , respectively. DMI is included in Eq. 1 via an additional term given by  $A \sum_{i,j} (\mathbf{S}_i \times \mathbf{S}_j)$ , where  $A$  is the strength of DMI and  $\mathbf{S}_{i,j}$  the spin vectors. We considered DMI perpendicular to the surface at second nearest neighbours since there is none at the first-nearest neighbours due to the symmetry of the lattice. The out-of-plane component of the magnetization  $S^z$  is utilized for following the evolution of the spin-textures. We have observed no modifications of the dynamics of merons and antimerons in monolayer  $\text{CrCl}_3$  with the inclusion of DMI.

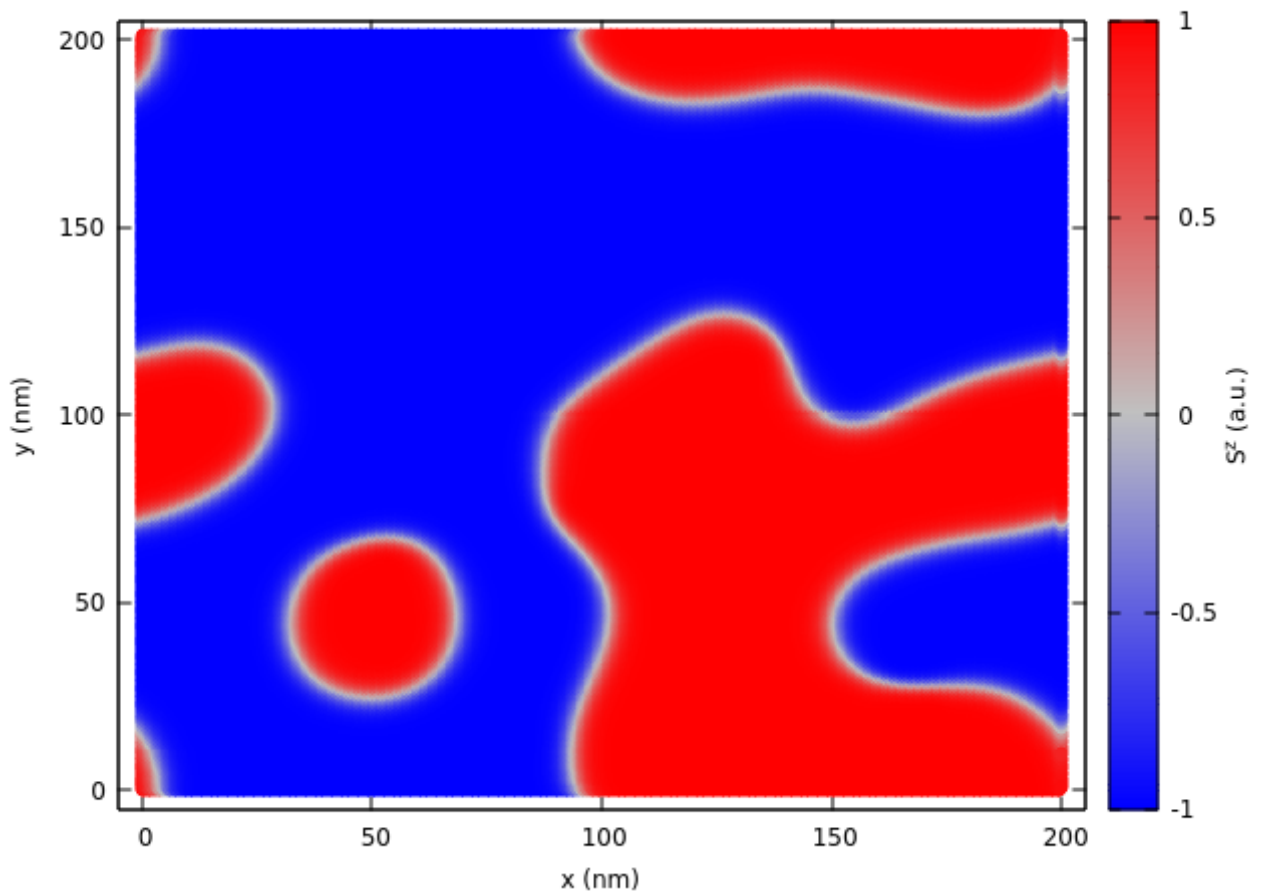

Figure S15: Snapshot of a spin dynamics of  $\text{CrCl}_3$  at 0 K considering a single-ion anisotropy slightly larger ( $36 \mu\text{eV}$ ) than that considered in the other simulations ( $12.67 \mu\text{eV}$ ) in this study. The fluctuations are still present but now with all spins pointing out-of-plane along  $S^z$  with no formation of merons or antimerons.

## 100 References

- 102 1. Kresse, G. & Furthmüller, J. Efficient iterative schemes for ab initio total-energy calculations  
103 using a plane-wave basis set. *Physical review B* **54**, 11169 (1996).
- 104 2. Perdew, J. P., Burke, K. & Ernzerhof, M. Generalized gradient approximation made sim-  
105 ple. *Phys. Rev. Lett.* **77**, 3865–3868 (1996). URL [https://link.aps.org/doi/10.1103/  
106 PhysRevLett.77.3865](https://link.aps.org/doi/10.1103/PhysRevLett.77.3865).
- 107 3. Dudarev, S. L., Botton, G. A., Savrasov, S. Y., Humphreys, C. J. & Sutton, A. P. Electron-  
108 energy-loss spectra and the structural stability of nickel oxide: An lsdau study. *Phys. Rev. B*  
109 **57**, 1505–1509 (1998). URL <https://link.aps.org/doi/10.1103/PhysRevB.57.1505>.
- 110 4. Liu, J., Sun, Q., Kawazoe, Y. & Jena, P. Exfoliating biocompatible ferromagnetic cr-trihalide  
111 monolayers. *Physical Chemistry Chemical Physics* **18**, 8777–8784 (2016).
- 112 5. Kartsev, A., Augustin, M., Evans, R. F. L., Novoselov, K. S. & Santos, E. J. G. Higher-order  
113 exchange interactions in two-dimensional magnets. *arXiv:2006.04891* (2020).
- 114 6. Evans, R. F. L. *et al.* Atomistic spin model simulations of magnetic nanomaterials. *Jour-  
115 nal of Physics: Condensed Matter* **26**, 103202 (2014). URL [https://doi.org/10.1088/  
116 2F0953-8984%2F26%2F10%2F103202](https://doi.org/10.1088/2F0953-8984%2F26%2F10%2F103202).
- 117 7. Ellis, M. O. A. *et al.* The landau–lifshitz equation in atomistic models. *Low Temperature  
118 Physics* **41**, 705–712 (2015). URL <https://doi.org/10.1063/1.4930971>. [https://doi.  
119 org/10.1063/1.4930971](https://doi.org/10.1063/1.4930971).

- 120 8. Alzate-Cardona, J. D., Sabogal-Suárez, D., Evans, R. F. L. & Restrepo-Parra, E. Optimal phase  
121 space sampling for monte carlo simulations of heisenberg spin systems. *Journal of Physics:*  
122 *Condensed Matter* **31**, 095802 (2019). URL [https://doi.org/10.1088%2F1361-648x%](https://doi.org/10.1088%2F1361-648x%2F1361-648x/2019095802)  
123 [2Faaf852](https://doi.org/10.1088%2F1361-648x/2019095802).
- 124 9. Bowden, G. J., Stenning, G. B. G. & van der Laan, G. Inter and intra macro-cell model for  
125 point dipole-dipole energy calculations. *Journal of Physics: Condensed Matter* **28**, 066001  
126 (2016). URL <http://stacks.iop.org/0953-8984/28/i=6/a=066001>.
- 127 10. VAMPIRE software package. Version 6. Available from <http://vampire.york.ac.uk/>.
- 128 11. Van Oosterom, A. & Strackee, J. The solid angle of a plane triangle. *IEEE Transactions on*  
129 *Biomedical Engineering* **BME-30**, 125–126 (1983).
- 130 12. Berg, B. & Lüscher, M. Definition and statistical distributions of a topological number in  
131 the lattice  $o(3)$  -model. *Nuclear Physics B* **190**, 412 – 424 (1981). URL [http://www.](http://www.sciencedirect.com/science/article/pii/055032138190568X)  
132 [sciencedirect.com/science/article/pii/055032138190568X](http://www.sciencedirect.com/science/article/pii/055032138190568X).
- 133 13. Rózsa, L., Simon, E., Palotás, K., Udvardi, L. & Szunyogh, L. Complex magnetic phase  
134 diagram and skyrmion lifetime in an ultrathin film from atomistic simulations. *Phys. Rev. B*  
135 **93**, 024417 (2016). URL <https://link.aps.org/doi/10.1103/PhysRevB.93.024417>.
- 136 14. Vedmedenko, E. Y., Oepen, H. P., Ghazali, A., Lévy, J.-C. S. & Kirschner, J. Magnetic mi-  
137 crostructure of the spin reorientation transition: A computer experiment. *Phys. Rev. Lett.* **84**,  
138 5884–5887 (2000). URL <https://link.aps.org/doi/10.1103/PhysRevLett.84.5884>.



139 15. Gouva, M. E., Wysin, G. M., Bishop, A. R. & Mertens, F. G. Vortices in the classical two-  
140 dimensional anisotropic heisenberg model. *Phys. Rev. B* **39**, 11840–11849 (1989). URL  
141 <https://link.aps.org/doi/10.1103/PhysRevB.39.11840>.
